# Supplementary material for: Calculations of interaction energies of ellipticine derivatives with DNA base pairs
Source: Royal Society of Chemistry journal article supplement (doi:10.1039/b400471j), 2004-01-01
Supplement: b400471j.doc [file b400471j.doc]

**Electronic supplementary information**

| atom | x | y | z | type | RESP-HF | RESP-DFT | RESP-MP2 | ESP-HF | ESP-DFT | ESP-MP2 |
| --- | --- | --- | --- | --- | --- | --- | --- | --- | --- | --- |
| C1 | -2,896 | -1,668 | 0,01 | CA | -0,003 | -0,033 | -0,04 | 0,144 | 0,026 | -0,019 |
| N2 | -4,16 | -1,219 | 0,037 | NA | -0,174 | -0,132 | -0,129 | -0,285 | -0,176 | -0,147 |
| C3 | -4,471 | 0,119 | 0,046 | CA | -0,152 | -0,137 | -0,141 | -0,06 | -0,102 | -0,133 |
| C4 | -3,462 | 1,031 | 0,025 | CA | -0,104 | -0,075 | -0,063 | -0,221 | -0,112 | -0,046 |
| C4a | -2,088 | 0,636 | -0,008 | CA | 0,048 | 0,037 | 0,025 | 0,254 | 0,104 | -0,019 |
| C5 | -1,048 | 1,581 | -0,028 | CA | 0,006 | 0,023 | 0,071 | -0,11 | 0,005 | 0,148 |
| C5a | 0,247 | 1,059 | -0,012 | CN | 0,04 | 0,018 | 0,008 | 0,341 | 0,23 | 0,142 |
| N6 | 1,424 | 1,746 | -0,001 | NA | -0,344 | -0,267 | -0,295 | -0,571 | -0,45 | -0,448 |
| C6a | 2,507 | 0,864 | 0,006 | CN | 0,162 | 0,118 | 0,124 | 0,304 | 0,235 | 0,234 |
| C7 | 3,866 | 1,16 | 0,024 | CA | -0,244 | -0,179 | -0,173 | -0,341 | -0,262 | -0,252 |
| C8 | 4,752 | 0,083 | 0,031 | CA | -0,085 | -0,086 | -0,091 | -0,051 | -0,061 | -0,078 |
| C9 | 4,287 | -1,241 | 0,024 | CA | -0,172 | -0,125 | -0,12 | -0,197 | -0,135 | -0,114 |
| C10 | 2,924 | -1,524 | 0,008 | CA | -0,175 | -0,141 | -0,155 | -0,222 | -0,2 | -0,235 |
| C10a | 2,008 | -0,461 | -0,004 | CB | 0,062 | 0,062 | 0,079 | 0,142 | 0,15 | 0,182 |
| C10b | 0,555 | -0,355 | -0,015 | CB | -0,008 | -0,005 | -0,001 | -0,3 | -0,248 | -0,224 |
| C11 | -0,458 | -1,298 | -0,03 | CA | 0,009 | 0,021 | 0,046 | 0,282 | 0,239 | 0,257 |
| C11a | -1,805 | -0,799 | -0,012 | CA | 0,034 | 0,033 | 0,028 | -0,219 | -0,09 | -0,016 |
| C12 | -1,293 | 3,071 | -0,043 | CT | -0,192 | -0,188 | -0,282 | -0,358 | -0,381 | -0,499 |
| C13 | -0,118 | -2,767 | -0,059 | CT | -0,181 | -0,188 | -0,247 | -0,399 | -0,408 | -0,524 |
| H1 | -2,789 | -2,744 | 0,013 | HC | 0,192 | 0,163 | 0,16 | 0,166 | 0,152 | 0,157 |
| H2 | -4,915 | -1,897 | 0,055 | H | 0,355 | 0,338 | 0,344 | 0,377 | 0,347 | 0,349 |
| H3 | -5,523 | 0,371 | 0,074 | HC | 0,224 | 0,193 | 0,189 | 0,211 | 0,189 | 0,189 |
| H4 | -3,724 | 2,082 | 0,042 | HC | 0,167 | 0,149 | 0,152 | 0,187 | 0,153 | 0,145 |
| H6 | 1,51 | 2,752 | 0,031 | H | 0,362 | 0,331 | 0,336 | 0,419 | 0,378 | 0,376 |
| H7 | 4,226 | 2,184 | 0,031 | HC | 0,176 | 0,149 | 0,149 | 0,203 | 0,172 | 0,172 |
| H8 | 5,82 | 0,275 | 0,044 | HC | 0,162 | 0,143 | 0,141 | 0,16 | 0,142 | 0,142 |
| H9 | 5,002 | -2,058 | 0,033 | HC | 0,158 | 0,138 | 0,14 | 0,168 | 0,145 | 0,144 |
| H10 | 2,592 | -2,556 | 0,01 | HC | 0,171 | 0,136 | 0,136 | 0,189 | 0,157 | 0,159 |
| H12a | -1,518 | 3,461 | 0,958 | HC | 0,087 | 0,088 | 0,106 | 0,131 | 0,136 | 0,162 |
| H12b | -0,423 | 3,618 | -0,419 | HC | 0,081 | 0,08 | 0,106 | 0,122 | 0,123 | 0,15 |
| h12c | -2,125 | 3,341 | -0,7 | HC | 0,081 | 0,08 | 0,106 | 0,134 | 0,138 | 0,163 |
| H13a | 0,408 | -3,06 | 0,857 | HC | 0,087 | 0,088 | 0,096 | 0,139 | 0,14 | 0,165 |
| H13b | 0,548 | -2,984 | -0,901 | HC | 0,087 | 0,088 | 0,096 | 0,14 | 0,141 | 0,166 |
| H13c | -0,982 | -3,425 | -0,162 | HC | 0,081 | 0,08 | 0,096 | 0,122 | 0,124 | 0,151 |
|  |  |  |  |  |  |  | HOMO | -10,59 | -8,79 | -10,53 |
|  |  |  |  |  |  |  | LUMO | -2,23 | -5,60 | -2,16 |
|  |  |  |  |  |  |  | dip. mom. | 8,24 | 7,04 | 7,19 |

**Table S1.** The geometry, Amber types, RESP and ESP charges derived from Hartree-Fock, DFT (B3LYP) and MP2(0.25) wave functions, the energies of the frontier orbitals [eV] ans dipole moments [D] for the E+ (**5**).

| Atom | x | y | z | type | RESP-HF | RESP-DFT | RESP-MP2 | ESP-HF | ESP-DFT | ESP-MP2 |
| --- | --- | --- | --- | --- | --- | --- | --- | --- | --- | --- |
| C1 | -3,094 | -1,885 | -0,002 | CA | 0,253 | 0,214 | 0,203 | 0,528 | 0,446 | 0,430 |
| N2 | -4,390 | -1,646 | -0,008 | NC | -0,559 | -0,494 | -0,485 | -0,700 | -0,618 | -0,599 |
| C3 | -4,774 | -0,340 | -0,012 | CA | 0,150 | 0,129 | 0,107 | 0,369 | 0,321 | 0,279 |
| C4 | -3,895 | 0,714 | -0,008 | CA | -0,225 | -0,166 | -0,142 | -0,537 | -0,420 | -0,352 |
| C4a | -2,491 | 0,480 | 0,000 | CA | 0,076 | 0,049 | 0,030 | 0,510 | 0,365 | 0,269 |
| C5 | -1,552 | 1,547 | 0,005 | CA | -0,032 | -0,011 | 0,029 | -0,277 | -0,160 | -0,043 |
| C5a | -0,216 | 1,184 | 0,004 | CN | -0,042 | -0,046 | -0,056 | 0,263 | 0,172 | 0,133 |
| N6 | 0,898 | 2,004 | 0,005 | NA | -0,284 | -0,218 | -0,242 | -0,459 | -0,358 | -0,376 |
| C6a | 2,057 | 1,238 | 0,000 | CN | 0,063 | 0,040 | 0,052 | 0,027 | 0,012 | 0,025 |
| C7 | 3,386 | 1,649 | -0,005 | CA | -0,272 | -0,235 | -0,234 | -0,197 | -0,172 | -0,183 |
| C8 | 4,379 | 0,668 | -0,007 | CA | -0,215 | -0,165 | -0,155 | -0,394 | -0,323 | -0,306 |
| C9 | 4,042 | -0,695 | -0,004 | C | 0,232 | 0,165 | 0,142 | 0,460 | 0,369 | 0,345 |
| C10 | 2,707 | -1,104 | 0,001 | CA | -0,203 | -0,140 | -0,117 | -0,507 | -0,406 | -0,405 |
| C10a | 1,697 | -0,135 | 0,003 | CB | 0,048 | 0,025 | 0,039 | 0,349 | 0,276 | 0,324 |
| C10b | 0,238 | -0,183 | 0,005 | CB | 0,033 | 0,030 | 0,014 | -0,341 | -0,262 | -0,303 |
| C11 | -0,673 | -1,232 | 0,007 | CA | -0,071 | -0,049 | -0,028 | 0,327 | 0,279 | 0,329 |
| C11a | -2,063 | -0,899 | 0,002 | CA | -0,037 | -0,021 | -0,021 | -0,531 | -0,408 | -0,374 |
| C12 | -1,999 | 2,989 | 0,008 | CT | -0,142 | -0,153 | -0,191 | -0,116 | -0,176 | -0,282 |
| C13 | -0,166 | -2,655 | 0,013 | CT | -0,118 | -0,155 | -0,202 | -0,368 | -0,407 | -0,521 |
| O9 | 4,996 | -1,683 | -0,006 | OH | -0,606 | -0,527 | -0,527 | -0,643 | -0,561 | -0,560 |
| H1 | -2,825 | -2,938 | -0,001 | HC | 0,087 | 0,062 | 0,067 | 0,027 | 0,011 | 0,008 |
| H3 | -5,848 | -0,166 | -0,018 | HC | 0,106 | 0,078 | 0,080 | 0,070 | 0,046 | 0,050 |
| H4 | -4,278 | 1,729 | -0,013 | HC | 0,116 | 0,092 | 0,095 | 0,172 | 0,135 | 0,127 |
| H6 | 0,877 | 3,011 | -0,021 | H | 0,321 | 0,291 | 0,294 | 0,387 | 0,347 | 0,349 |
| H7 | 3,654 | 2,702 | -0,007 | HC | 0,191 | 0,159 | 0,157 | 0,185 | 0,153 | 0,154 |
| H8 | 5,426 | 0,964 | -0,011 | HC | 0,151 | 0,119 | 0,125 | 0,191 | 0,154 | 0,159 |
| H9 | 5,874 | -1,272 | -0,009 | HO | 0,443 | 0,414 | 0,404 | 0,440 | 0,412 | 0,401 |
| H10 | 2,495 | -2,165 | 0,002 | HC | 0,191 | 0,149 | 0,153 | 0,265 | 0,212 | 0,225 |
| H12a | -2,560 | 3,245 | -0,900 | HC | 0,058 | 0,059 | 0,069 | 0,069 | 0,080 | 0,105 |
| H12b | -2,650 | 3,208 | 0,863 | HC | 0,058 | 0,059 | 0,069 | 0,071 | 0,082 | 0,108 |
| h12c | -1,155 | 3,683 | 0,069 | HC | 0,058 | 0,059 | 0,069 | 0,032 | 0,042 | 0,064 |
| H13a | -0,961 | -3,399 | 0,030 | HC | 0,057 | 0,062 | 0,069 | 0,123 | 0,126 | 0,155 |
| H13b | 0,448 | -2,852 | -0,874 | HC | 0,057 | 0,062 | 0,069 | 0,104 | 0,114 | 0,132 |
| H13c | 0,469 | -2,836 | 0,889 | HC | 0,057 | 0,062 | 0,069 | 0,104 | 0,114 | 0,132 |
|  |  |  |  |  |  |  | HOMO | -6,92 | -5,03 | -6,86 |
|  |  |  |  |  |  |  | LUMO | 1,94 | -1,37 | 2,00 |
|  |  |  |  |  |  |  | dip. mom. | 5,27 | 5,56 | 5.75 |

**Table S2.** The geometry, Amber types, RESP and ESP charges derived from Hartree-Fock, DFT (B3LYP) and MP2(0.25) wave functions, the energies of the frontier orbitals [eV] ans dipole moments [D] for the 9HE (**3**).

| atom | x | y | z | type | RESP-HF | RESP-DFT | RESP-MP2 | ESP-HF | ESP-DFT | ESP-MP2 |
| --- | --- | --- | --- | --- | --- | --- | --- | --- | --- | --- |
| C1 | -3,391 | -1,500 | 0,000 | CA | 0,216 | 0,182 | 0,165 | 0,499 | 0,431 | 0,410 |
| N2 | -4,610 | -1,000 | 0,000 | NC | -0,544 | -0,479 | -0,468 | -0,692 | -0,611 | -0,596 |
| C3 | -4,718 | 0,356 | 0,000 | CA | 0,150 | 0,122 | 0,100 | 0,380 | 0,328 | 0,298 |
| C4 | -3,642 | 1,207 | 0,000 | CA | -0,244 | -0,175 | -0,164 | -0,556 | -0,433 | -0,395 |
| C4a | -2,316 | 0,690 | 0,000 | CA | 0,036 | 0,018 | 0,017 | 0,382 | 0,264 | 0,189 |
| C5 | -1,179 | 1,542 | 0,000 | CA | 0,035 | 0,049 | 0,101 | -0,005 | 0,072 | 0,211 |
| C5a | 0,055 | 0,912 | 0,000 | CN | -0,056 | -0,063 | -0,086 | 0,054 | 0,012 | -0,087 |
| N6 | 1,314 | 1,487 | 0,000 | NA | -0,341 | -0,268 | -0,289 | -0,421 | -0,342 | -0,343 |
| C6a | 2,277 | 0,495 | 0,000 | CN | 0,146 | 0,131 | 0,153 | 0,081 | 0,084 | 0,126 |
| C7 | 3,665 | 0,650 | 0,000 | C | 0,208 | 0,148 | 0,150 | 0,345 | 0,267 | 0,252 |
| C8 | 4,450 | -0,500 | 0,000 | CA | -0,245 | -0,192 | -0,188 | -0,409 | -0,338 | -0,320 |
| C9 | 3,851 | -1,772 | 0,000 | CA | -0,232 | -0,211 | -0,221 | -0,082 | -0,077 | -0,094 |
| C10 | 2,468 | -1,924 | 0,000 | CA | -0,187 | -0,147 | -0,144 | -0,360 | -0,306 | -0,296 |
| C10a | 1,658 | -0,775 | 0,000 | CB | 0,023 | 0,015 | 0,014 | 0,186 | 0,162 | 0,137 |
| C10b | 0,219 | -0,519 | 0,000 | CB | 0,011 | 0,000 | 0,010 | -0,184 | -0,176 | -0,125 |
| C11 | -0,888 | -1,359 | 0,000 | CA | -0,020 | -0,004 | 0,019 | 0,309 | 0,304 | 0,324 |
| C11a | -2,179 | -0,747 | 0,000 | CA | -0,025 | -0,016 | -0,016 | -0,481 | -0,395 | -0,362 |
| C12 | -1,317 | 3,045 | 0,000 | CT | -0,223 | -0,213 | -0,295 | -0,380 | -0,395 | -0,518 |
| C13 | -0,683 | -2,856 | 0,000 | CT | -0,188 | -0,193 | -0,271 | -0,482 | -0,505 | -0,623 |
| O7 | 4,149 | 1,936 | 0,000 | OH | -0,610 | -0,534 | -0,544 | -0,653 | -0,575 | -0,586 |
| H1 | -3,344 | -2,586 | 0,000 | HC | 0,096 | 0,070 | 0,075 | 0,040 | 0,019 | 0,022 |
| H3 | -5,734 | 0,746 | 0,000 | HC | 0,109 | 0,084 | 0,086 | 0,071 | 0,048 | 0,051 |
| H4 | -3,809 | 2,279 | 0,000 | HC | 0,129 | 0,100 | 0,107 | 0,190 | 0,149 | 0,149 |
| H6 | 1,522 | 2,472 | 0,000 | H | 0,358 | 0,321 | 0,331 | 0,400 | 0,361 | 0,367 |
| H7 | 5,118 | 1,907 | 0,000 | HO | 0,448 | 0,420 | 0,413 | 0,460 | 0,432 | 0,427 |
| H8 | 5,535 | -0,408 | 0,000 | HC | 0,161 | 0,128 | 0,133 | 0,194 | 0,157 | 0,159 |
| H9 | 4,489 | -2,651 | 0,000 | HC | 0,173 | 0,148 | 0,150 | 0,150 | 0,128 | 0,130 |
| H10 | 2,036 | -2,917 | 0,000 | HC | 0,155 | 0,122 | 0,122 | 0,192 | 0,157 | 0,156 |
| H12a | -0,346 | 3,549 | 0,000 | HC | 0,078 | 0,074 | 0,093 | 0,103 | 0,101 | 0,126 |
| H12b | -1,863 | 3,402 | -0,883 | HC | 0,078 | 0,074 | 0,093 | 0,123 | 0,125 | 0,152 |
| h12c | -1,863 | 3,402 | 0,883 | HC | 0,078 | 0,074 | 0,093 | 0,123 | 0,125 | 0,152 |
| H13a | -0,111 | -3,169 | 0,882 | HC | 0,075 | 0,072 | 0,087 | 0,140 | 0,142 | 0,165 |
| H13b | -1,615 | -3,421 | 0,000 | HC | 0,075 | 0,072 | 0,087 | 0,146 | 0,146 | 0,174 |
| H13c | -0,111 | -3,169 | -0,882 | HC | 0,075 | 0,072 | 0,087 | 0,140 | 0,142 | 0,165 |
|  |  |  |  |  |  |  | HOMO | -6,98 | -5,10 | -6,91 |
|  |  |  |  |  |  |  | LUMO | 2,01 | -1,32 | 2,07 |
|  |  |  |  |  |  |  | dip. mom. | 4,77 | 5,19 | 5,23 |

**Table S3.** The geometry, Amber types, RESP and ESP charges derived from Hartree-Fock, DFT (B3LYP) and MP2(0.25) wave functions, the energies of the frontier orbitals [eV] ans dipole moments [D] for the 7HE (**4**).

| atom | x | y | z | type | RESP-HF | RESP-DFT | RESP-MP2 | ESP-HF | ESP-DFT | ESP-MP2 |
| --- | --- | --- | --- | --- | --- | --- | --- | --- | --- | --- |
| C1 | -2,893 | -1,398 | -0,004 | CA | 0,000 | -0,027 | -0,039 | 0,112 | -0,021 | -0,069 |
| N2 | -4,165 | -0,978 | 0,025 | N* | 0,077 | 0,099 | 0,129 | 0,140 | 0,232 | 0,303 |
| C3 | -4,451 | 0,372 | 0,039 | CA | -0,134 | -0,112 | -0,120 | -0,165 | -0,198 | -0,249 |
| C4 | -3,447 | 1,288 | 0,021 | CA | -0,147 | -0,121 | -0,110 | -0,201 | -0,100 | -0,024 |
| C4a | -2,071 | 0,903 | -0,013 | CA | 0,049 | 0,037 | 0,022 | 0,228 | 0,076 | -0,053 |
| C5 | -1,030 | 1,847 | -0,028 | CA | 0,015 | 0,031 | 0,074 | -0,076 | 0,035 | 0,182 |
| C5a | 0,264 | 1,321 | -0,012 | CN | 0,021 | 0,006 | -0,003 | 0,262 | 0,169 | 0,074 |
| N6 | 1,442 | 2,004 | 0,003 | NA | -0,293 | -0,230 | -0,252 | -0,484 | -0,390 | -0,400 |
| C6a | 2,522 | 1,115 | 0,008 | CN | 0,112 | 0,097 | 0,109 | 0,168 | 0,158 | 0,215 |
| C7 | 3,884 | 1,389 | 0,028 | CA | -0,250 | -0,217 | -0,214 | -0,217 | -0,201 | -0,236 |
| C8 | 4,763 | 0,308 | 0,033 | CA | -0,205 | -0,150 | -0,143 | -0,344 | -0,269 | -0,231 |
| C9 | 4,287 | -1,016 | 0,019 | C | 0,287 | 0,216 | 0,197 | 0,451 | 0,362 | 0,319 |
| C10 | 2,915 | -1,283 | 0,000 | CA | -0,225 | -0,154 | -0,135 | -0,403 | -0,317 | -0,270 |
| C10a | 2,018 | -0,208 | -0,009 | CB | 0,002 | -0,004 | -0,014 | 0,129 | 0,110 | 0,047 |
| C10b | 0,565 | -0,095 | -0,022 | CB | 0,039 | 0,027 | 0,034 | -0,194 | -0,164 | -0,094 |
| C11 | -0,452 | -1,034 | -0,042 | CA | 0,012 | 0,023 | 0,045 | 0,288 | 0,245 | 0,248 |
| C11a | -1,797 | -0,530 | -0,022 | CA | -0,024 | -0,017 | -0,023 | -0,303 | -0,152 | -0,090 |
| C12 | -1,260 | 3,339 | -0,036 | CT | -0,217 | -0,210 | -0,282 | -0,365 | -0,384 | -0,503 |
| C13 | -0,114 | -2,504 | -0,079 | CT | -0,144 | -0,156 | -0,219 | -0,378 | -0,388 | -0,482 |
| C2 | -5,286 | -1,936 | 0,048 | CT | -0,192 | -0,194 | -0,265 | -0,404 | -0,403 | -0,488 |
| O9 | 5,117 | -2,095 | 0,026 | OH | -0,605 | -0,517 | -0,518 | -0,631 | -0,540 | -0,539 |
| H1 | -2,767 | -2,472 | -0,006 | HC | 0,188 | 0,154 | 0,157 | 0,171 | 0,154 | 0,160 |
| H2a | -5,875 | -1,787 | 0,956 | HC | 0,129 | 0,127 | 0,148 | 0,184 | 0,178 | 0,203 |
| H2b | -5,918 | -1,780 | -0,830 | HC | 0,129 | 0,127 | 0,148 | 0,184 | 0,178 | 0,202 |
| H2c | -4,893 | -2,952 | 0,034 | HC | 0,129 | 0,127 | 0,148 | 0,173 | 0,170 | 0,191 |
| H3 | -5,501 | 0,634 | 0,067 | HC | 0,205 | 0,173 | 0,170 | 0,220 | 0,196 | 0,198 |
| H4 | -3,719 | 2,336 | 0,044 | HC | 0,178 | 0,158 | 0,162 | 0,191 | 0,157 | 0,149 |
| H6 | 1,530 | 3,008 | 0,043 | H | 0,343 | 0,316 | 0,320 | 0,394 | 0,359 | 0,359 |
| H7 | 4,262 | 2,407 | 0,041 | HC | 0,200 | 0,171 | 0,168 | 0,201 | 0,176 | 0,178 |
| H8 | 5,835 | 0,492 | 0,048 | HC | 0,168 | 0,139 | 0,143 | 0,203 | 0,169 | 0,169 |
| H9 | 6,042 | -1,803 | 0,041 | HO | 0,456 | 0,428 | 0,419 | 0,452 | 0,424 | 0,415 |
| H10 | 2,596 | -2,317 | -0,003 | HC | 0,216 | 0,171 | 0,177 | 0,254 | 0,206 | 0,210 |
| H12a | -0,422 | 3,866 | -0,503 | HC | 0,088 | 0,087 | 0,105 | 0,122 | 0,122 | 0,151 |
| H12b | -2,148 | 3,616 | -0,611 | HC | 0,088 | 0,087 | 0,105 | 0,132 | 0,134 | 0,159 |
| h12c | -1,380 | 3,742 | 0,978 | HC | 0,088 | 0,087 | 0,105 | 0,130 | 0,134 | 0,160 |
| H13a | 0,408 | -2,803 | 0,838 | HC | 0,073 | 0,074 | 0,084 | 0,130 | 0,131 | 0,146 |
| H13b | -0,978 | -3,160 | -0,190 | HC | 0,073 | 0,074 | 0,084 | 0,116 | 0,118 | 0,141 |
| H13c | 0,556 | -2,716 | -0,918 | HC | 0,073 | 0,074 | 0,084 | 0,131 | 0,132 | 0,148 |
|  |  |  |  |  |  |  | HOMO | -10,20 | -8,21 | -10,12 |
|  |  |  |  |  |  |  | LUMO | -1,88 | -5,35 | -1,93 |
|  |  |  |  |  |  |  | dip. mom. | 8,18 | 6,70 | 7,16 |

**Table S4.** The geometry, Amber types, RESP and ESP charges derived from Hartree-Fock, DFT (B3LYP) and MP2(0.25) wave functions, the energies of the frontier orbitals [eV] ans dipole moments [D] for the 9HNME (**2**).

| atom | x | y | z | type | RESP-HF | RESP-DFT | RESP-MP2 | ESP-HF | ESP-DFT | ESP-MP2 |
| --- | --- | --- | --- | --- | --- | --- | --- | --- | --- | --- |
| C1 | 3,018 | -1,862 | 0,006 | CA | -0,011 | -0,042 | -0,044 | 0,147 | 0,026 | 0,006 |
| N2 | 4,325 | -1,556 | 0,030 | NA | -0,132 | -0,105 | -0,105 | -0,252 | -0,157 | -0,132 |
| C3 | 4,779 | -0,258 | 0,042 | CA | -0,179 | -0,155 | -0,158 | -0,081 | -0,117 | -0,151 |
| C4 | 3,877 | 0,759 | 0,024 | CA | -0,090 | -0,066 | -0,046 | -0,216 | -0,110 | -0,038 |
| C4a | 2,466 | 0,517 | -0,008 | CA | 0,099 | 0,076 | 0,055 | 0,333 | 0,170 | 0,057 |
| C5 | 1,535 | 1,568 | -0,028 | CA | -0,067 | -0,039 | 0,004 | -0,220 | -0,089 | 0,049 |
| C5a | 0,189 | 1,190 | -0,012 | CN | 0,028 | 0,010 | -0,007 | 0,263 | 0,152 | 0,079 |
| N6 | -0,902 | 1,999 | 0,001 | NA | -0,232 | -0,174 | -0,194 | -0,401 | -0,307 | -0,327 |
| C6a | -2,077 | 1,238 | 0,007 | CN | 0,061 | 0,048 | 0,074 | 0,091 | 0,094 | 0,160 |
| C7 | -3,401 | 1,663 | 0,026 | CA | -0,270 | -0,228 | -0,238 | -0,240 | -0,224 | -0,280 |
| C8 | -4,395 | 0,692 | 0,029 | CA | -0,155 | -0,106 | -0,080 | -0,315 | -0,235 | -0,171 |
| C9 | -4,089 | -0,690 | 0,013 | CA | 0,268 | 0,179 | 0,102 | 0,500 | 0,381 | 0,277 |
| C10 | -2,745 | -1,098 | -0,008 | CA | -0,246 | -0,161 | -0,141 | -0,492 | -0,371 | -0,348 |
| C10a | -1,730 | -0,132 | -0,009 | CB | 0,014 | 0,001 | 0,018 | 0,216 | 0,159 | 0,172 |
| C10b | -0,273 | -0,185 | -0,018 | CB | 0,058 | 0,047 | 0,031 | -0,192 | -0,129 | -0,140 |
| C11 | 0,634 | -1,230 | -0,025 | CA | -0,029 | -0,011 | 0,008 | 0,196 | 0,147 | 0,182 |
| C11a | 2,028 | -0,880 | -0,010 | CA | 0,022 | 0,031 | 0,027 | -0,227 | -0,086 | -0,046 |
| C12 | 1,930 | 3,025 | -0,041 | CT | -0,215 | -0,216 | -0,267 | -0,277 | -0,313 | -0,425 |
| C13 | 0,137 | -2,654 | -0,039 | CT | -0,119 | -0,147 | -0,188 | -0,304 | -0,332 | -0,429 |
| N9 | -5,112 | -1,625 | 0,079 | N2 | -0,872 | -0,743 | -0,653 | -0,945 | -0,810 | -0,715 |
| H1 | 2,794 | -2,920 | 0,005 | HC | 0,188 | 0,158 | 0,159 | 0,160 | 0,147 | 0,144 |
| H2 | 5,000 | -2,311 | 0,044 | H | 0,336 | 0,323 | 0,330 | 0,359 | 0,333 | 0,336 |
| H3 | 5,852 | -0,122 | 0,069 | HC | 0,222 | 0,188 | 0,185 | 0,209 | 0,185 | 0,186 |
| H4 | 4,253 | 1,774 | 0,045 | HC | 0,162 | 0,144 | 0,145 | 0,180 | 0,146 | 0,135 |
| H6 | -0,877 | 3,008 | 0,042 | H | 0,335 | 0,309 | 0,312 | 0,383 | 0,348 | 0,350 |
| H7 | -3,661 | 2,717 | 0,037 | HC | 0,201 | 0,170 | 0,165 | 0,206 | 0,178 | 0,182 |
| H8 | -5,437 | 1,000 | 0,050 | HC | 0,177 | 0,149 | 0,157 | 0,214 | 0,180 | 0,181 |
| H9a | -4,897 | -2,560 | -0,243 | H2 | 0,377 | 0,351 | 0,313 | 0,393 | 0,367 | 0,329 |
| H9b | -6,029 | -1,315 | -0,212 | H2 | 0,394 | 0,365 | 0,330 | 0,399 | 0,370 | 0,334 |
| H10 | -2,517 | -2,157 | -0,012 | HC | 0,197 | 0,153 | 0,161 | 0,241 | 0,190 | 0,203 |
| H12a | 1,144 | 3,646 | -0,484 | HC | 0,091 | 0,091 | 0,104 | 0,102 | 0,107 | 0,133 |
| H12b | 2,122 | 3,408 | 0,970 | HC | 0,091 | 0,091 | 0,104 | 0,117 | 0,125 | 0,150 |
| h12c | 2,827 | 3,203 | -0,640 | HC | 0,091 | 0,091 | 0,104 | 0,118 | 0,124 | 0,149 |
| H13a | -0,507 | -2,822 | -0,909 | HC | 0,068 | 0,072 | 0,077 | 0,110 | 0,116 | 0,130 |
| H13b | 0,927 | -3,404 | -0,077 | HC | 0,068 | 0,072 | 0,077 | 0,102 | 0,107 | 0,132 |
| H13c | -0,463 | -2,859 | 0,855 | HC | 0,068 | 0,072 | 0,077 | 0,123 | 0,128 | 0,144 |
|  |  |  |  |  |  |  | HOMO | -9,77 | -7,82 | -9,73 |
|  |  |  |  |  |  |  | LUMO | -2,11 | -5,41 | -2,04 |
|  |  |  |  |  |  |  | dip. mom. | 8,40 | 6,52 | 6,79 |

**Table S5.** The geometry, Amber types, RESP and ESP charges derived from Hartree-Fock, DFT (B3LYP) and MP2(0.25) wave functions, the energies of the frontier orbitals [eV] ans dipole moments [D] for the 9AE+ (**6**).

| atom | x | y | z | type | RESP-HF | RESP-DFT | RESP-MP2 | ESP-HF | ESP-DFT | ESP-MP2 |
| --- | --- | --- | --- | --- | --- | --- | --- | --- | --- | --- |
| AN1 | -0,991 | 0,407 | 0,000 | NC | -0,112 | -0,085 | -0,084 | -0,576 | -0,493 | -0,506 |
| AC2 | -1,619 | 1,598 | 0,000 | CQ | 0,172 | 0,138 | 0,095 | 0,386 | 0,324 | 0,278 |
| AN3 | -2,929 | 1,841 | 0,000 | NC | -0,642 | -0,559 | -0,539 | -0,757 | -0,661 | -0,640 |
| AC4 | -3,633 | 0,698 | 0,000 | CB | 0,492 | 0,418 | 0,408 | 0,702 | 0,610 | 0,601 |
| AC5 | -3,129 | -0,606 | 0,000 | CB | 0,203 | 0,234 | 0,259 | -0,065 | 0,005 | 0,038 |
| AC6 | -1,720 | -0,733 | 0,000 | CA | 0,151 | 0,079 | 0,066 | 0,662 | 0,520 | 0,510 |
| AN6 | -1,089 | -1,919 | 0,000 | N2 | -0,562 | -0,483 | -0,475 | -0,921 | -0,798 | -0,800 |
| AN7 | -4,147 | -1,544 | 0,000 | NB | -0,546 | -0,501 | -0,496 | -0,570 | -0,528 | -0,524 |
| AC8 | -5,241 | -0,823 | 0,000 | CK | 0,125 | 0,102 | 0,085 | 0,292 | 0,258 | 0,240 |
| AN9 | -5,000 | 0,537 | 0,000 | NA | -0,440 | -0,377 | -0,376 | -0,618 | -0,548 | -0,550 |
| AH | -5,682 | 1,283 | 0,000 | H | 0,363 | 0,336 | 0,339 | 0,411 | 0,382 | 0,387 |
| AH2 | -0,956 | 2,461 | 0,000 | HC | 0,182 | 0,139 | 0,146 | 0,158 | 0,119 | 0,128 |
| AH61 | -1,640 | -2,765 | 0,000 | H2 | 0,338 | 0,310 | 0,304 | 0,422 | 0,385 | 0,381 |
| AH62 | -0,068 | -1,968 | 0,000 | H2 | 0,295 | 0,272 | 0,257 | 0,455 | 0,414 | 0,406 |
| AH8 | -6,249 | -1,217 | 0,000 | HC | 0,180 | 0,153 | 0,161 | 0,136 | 0,112 | 0,121 |
| TN1 | 3,884 | 1,580 | 0,000 | N | -0,329 | -0,251 | -0,280 | -0,548 | -0,434 | -0,470 |
| TC2 | 2,491 | 1,646 | 0,000 | C | 0,487 | 0,369 | 0,370 | 0,780 | 0,622 | 0,659 |
| TN3 | 1,888 | 0,404 | 0,000 | NA | 0,043 | 0,045 | -0,007 | -0,423 | -0,361 | -0,491 |
| TC4 | 2,517 | -0,835 | 0,000 | C | 0,469 | 0,353 | 0,331 | 0,720 | 0,556 | 0,561 |
| TC5 | 3,982 | -0,810 | 0,000 | CM | -0,018 | 0,020 | 0,076 | -0,091 | -0,005 | 0,066 |
| TC6 | 4,591 | 0,399 | 0,000 | CM | -0,196 | -0,206 | -0,218 | -0,026 | -0,082 | -0,094 |
| TC7 | 4,717 | -2,119 | 0,000 | CT | -0,274 | -0,237 | -0,304 | -0,434 | -0,417 | -0,524 |
| TH | 4,356 | 2,473 | 0,000 | H | 0,336 | 0,312 | 0,317 | 0,378 | 0,348 | 0,352 |
| TO2 | 1,888 | 2,707 | 0,000 | O | -0,557 | -0,472 | -0,461 | -0,627 | -0,535 | -0,533 |
| TH3 | 0,843 | 0,409 | 0,000 | H | -0,161 | -0,111 | -0,048 | 0,160 | 0,176 | 0,286 |
| TO4 | 1,860 | -1,881 | 0,000 | O | -0,507 | -0,434 | -0,409 | -0,621 | -0,533 | -0,517 |
| TH71 | 5,801 | -1,966 | 0,000 | HC | 0,093 | 0,083 | 0,096 | 0,121 | 0,115 | 0,138 |
| TH72 | 4,450 | -2,718 | -0,878 | HC | 0,093 | 0,083 | 0,096 | 0,145 | 0,137 | 0,159 |
| TH73 | 4,450 | -2,718 | 0,878 | HC | 0,093 | 0,083 | 0,096 | 0,145 | 0,137 | 0,159 |
| TH6 | 5,671 | 0,506 | 0,000 | HC | 0,228 | 0,190 | 0,194 | 0,205 | 0,176 | 0,179 |
|  |  |  |  |  |  |  | HOMO | -8,09 | -5,78 | -8,08 |
|  |  |  |  |  |  |  | LUMO | 3,00 | -0,90 | 2,95 |
|  |  |  |  |  |  |  | dip. mom. | 2,10 | 1,65 | 1,3 |

**Table S6.** The geometry, Amber types, RESP and ESP charges derived from Hartree-Fock, DFT (B3LYP) and MP2(0.25) wave functions, the energies of the frontier orbitals [eV] ans dipole moments [D] for the adenine-thymine base pair.

| atom | x | y | z | type | RESP-HF | RESP-DFT | RESP-MP2 | ESP-HF | ESP-DFT | ESP-MP2 |
| --- | --- | --- | --- | --- | --- | --- | --- | --- | --- | --- |
| GN1 | 0,734 | 0,251 | 0,000 | NA | -0,020 | -0,003 | -0,038 | -0,886 | -0,773 | -0,882 |
| GC2 | 1,285 | 1,512 | 0,000 | CA | 0,523 | 0,389 | 0,348 | 1,081 | 0,893 | 0,899 |
| GN3 | 2,592 | 1,737 | 0,000 | NC | -0,631 | -0,546 | -0,512 | -0,832 | -0,727 | -0,709 |
| GC4 | 3,307 | 0,593 | 0,000 | CB | 0,316 | 0,265 | 0,227 | 0,577 | 0,499 | 0,474 |
| GC5 | 2,861 | -0,733 | 0,000 | CB | 0,108 | 0,152 | 0,196 | -0,088 | -0,021 | 0,010 |
| GC6 | 1,448 | -0,964 | 0,000 | CA | 0,365 | 0,267 | 0,255 | 0,762 | 0,618 | 0,643 |
| GN7 | 3,926 | -1,619 | 0,000 | NB | -0,507 | -0,475 | -0,483 | -0,517 | -0,487 | -0,494 |
| GC8 | 4,985 | -0,854 | 0,000 | CK | 0,100 | 0,091 | 0,080 | 0,219 | 0,202 | 0,192 |
| GN9 | 4,676 | 0,498 | 0,000 | NA | -0,325 | -0,282 | -0,272 | -0,533 | -0,473 | -0,468 |
| GH1 | -0,295 | 0,161 | 0,000 | H | -0,116 | -0,090 | -0,036 | 0,453 | 0,410 | 0,503 |
| GN2 | 0,422 | 2,550 | 0,000 | N2 | -0,764 | -0,632 | -0,625 | -1,183 | -1,015 | -1,035 |
| GH21 | -0,595 | 2,434 | 0,000 | H2 | 0,416 | 0,348 | 0,339 | 0,589 | 0,508 | 0,508 |
| GH22 | 0,822 | 3,474 | 0,000 | H2 | 0,370 | 0,334 | 0,332 | 0,468 | 0,424 | 0,427 |
| GO6 | 0,838 | -2,043 | 0,000 | OS | -0,532 | -0,458 | -0,445 | -0,674 | -0,585 | -0,583 |
| GH | 5,316 | 1,279 | 0,000 | H | 0,329 | 0,303 | 0,304 | 0,394 | 0,363 | 0,366 |
| GH8 | 6,011 | -1,199 | 0,000 | HC | 0,162 | 0,133 | 0,141 | 0,136 | 0,108 | 0,116 |
| CN1 | -4,354 | 0,909 | 0,000 | NA | -0,169 | -0,093 | -0,106 | -0,627 | -0,474 | -0,485 |
| CC2 | -2,951 | 1,067 | 0,000 | CA | 0,450 | 0,317 | 0,309 | 1,033 | 0,814 | 0,812 |
| CN3 | -2,200 | -0,065 | 0,000 | NC | -0,154 | -0,061 | -0,056 | -0,980 | -0,774 | -0,788 |
| CC4 | -2,770 | -1,276 | 0,000 | CA | 0,467 | 0,281 | 0,259 | 1,316 | 1,019 | 1,009 |
| CC5 | -4,205 | -1,442 | 0,000 | CA | -0,283 | -0,163 | -0,145 | -0,773 | -0,576 | -0,556 |
| CC6 | -4,955 | -0,312 | 0,000 | CA | -0,142 | -0,195 | -0,218 | 0,256 | 0,129 | 0,104 |
| CH | -4,891 | 1,766 | 0,000 | H | 0,283 | 0,262 | 0,267 | 0,379 | 0,342 | 0,346 |
| CO2 | -2,494 | 2,214 | 0,000 | OS | -0,611 | -0,511 | -0,500 | -0,762 | -0,642 | -0,633 |
| CN4 | -1,964 | -2,343 | 0,000 | N2 | -0,841 | -0,681 | -0,671 | -1,383 | -1,167 | -1,171 |
| CH41 | -2,352 | -3,274 | 0,000 | H2 | 0,418 | 0,373 | 0,371 | 0,523 | 0,468 | 0,469 |
| CH42 | -0,933 | -2,229 | 0,000 | H2 | 0,409 | 0,355 | 0,349 | 0,646 | 0,571 | 0,573 |
| CH5 | -4,662 | -2,424 | 0,000 | HC | 0,159 | 0,131 | 0,134 | 0,243 | 0,201 | 0,204 |
| CH6 | -6,040 | -0,319 | 0,000 | HC | 0,219 | 0,191 | 0,194 | 0,161 | 0,145 | 0,149 |
|  |  |  |  |  |  |  | HOMO | -7,39 | -5,01 | -7,39 |
|  |  |  |  |  |  |  | LUMO | 2,66 | -1,21 | 2,65 |
|  |  |  |  |  |  |  | dip. mom. | 6,58 | 6,16 | 5,72 |

**Table S7.** The geometry, Amber types, RESP and ESP charges derived from Hartree-Fock, DFT (B3LYP) and MP2(0.25) wave functions, the energies of the frontier orbitals [eV] ans dipole moments [D] for the guanine-cytosine base pair.
